# Supplementary material for: Novel anilinocoumarin derivatives as agents against hepatitis C virus by the induction of IFN-mediated antiviral responses
Source: Royal Society of Chemistry journal article supplement (doi:10.1039/c2ob26860d), 2013-01-01

PCA-002

Mercury-400BB "Mercuryplus400"

Date: Jan 16 2012

Solvent: CDCl<sub>3</sub>

Ambient temperature

Total 32 repetitions

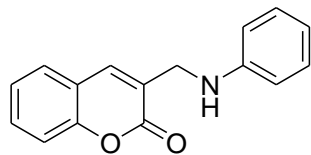

5

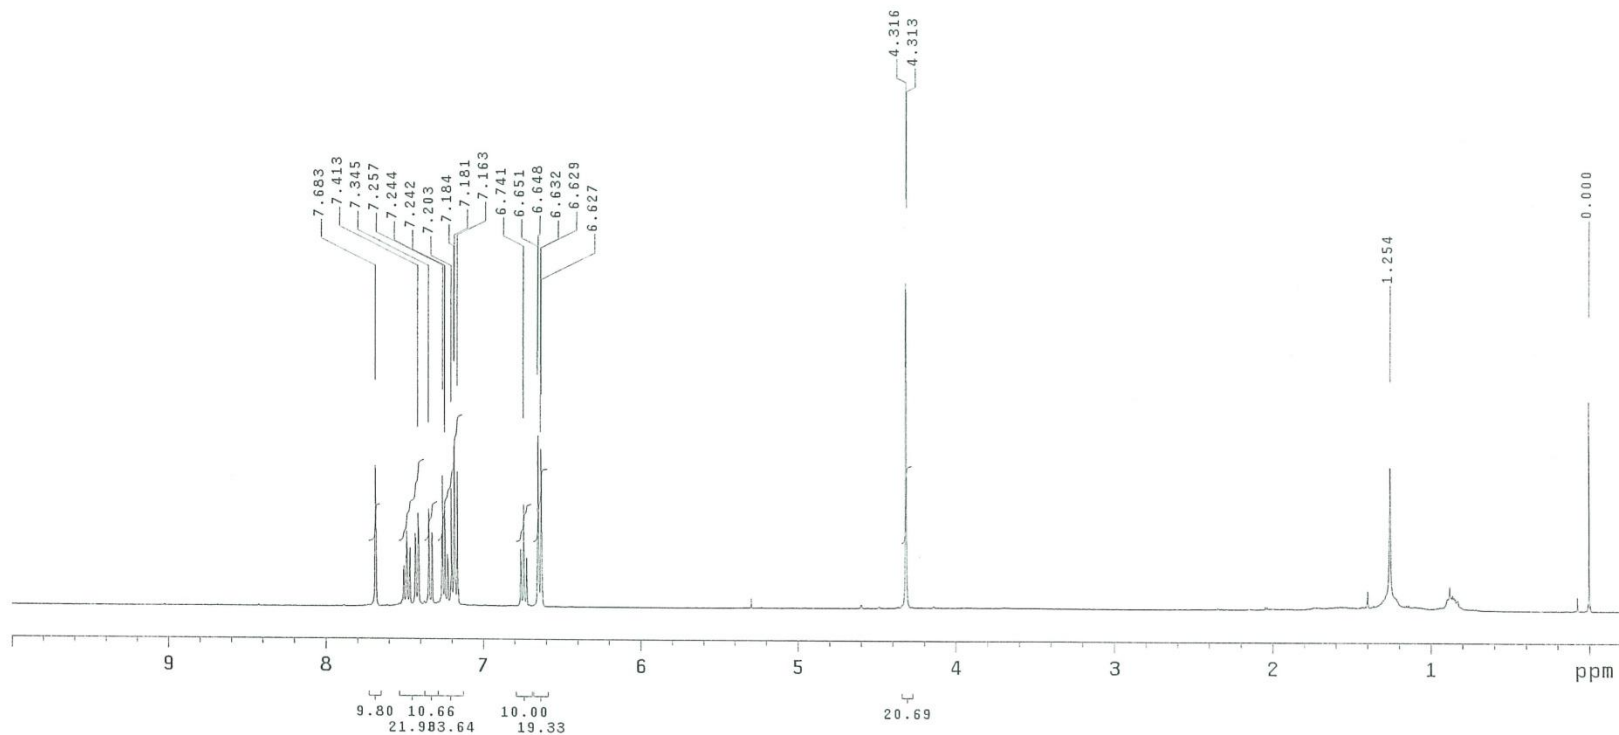

PCA-002

Mercury-400BB "Mercuryplus400"  
Date: Jan 16 2012  
Solvent: CDCl<sub>3</sub>  
Ambient temperature  
Total 32000 repetitions

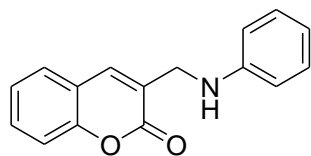

5

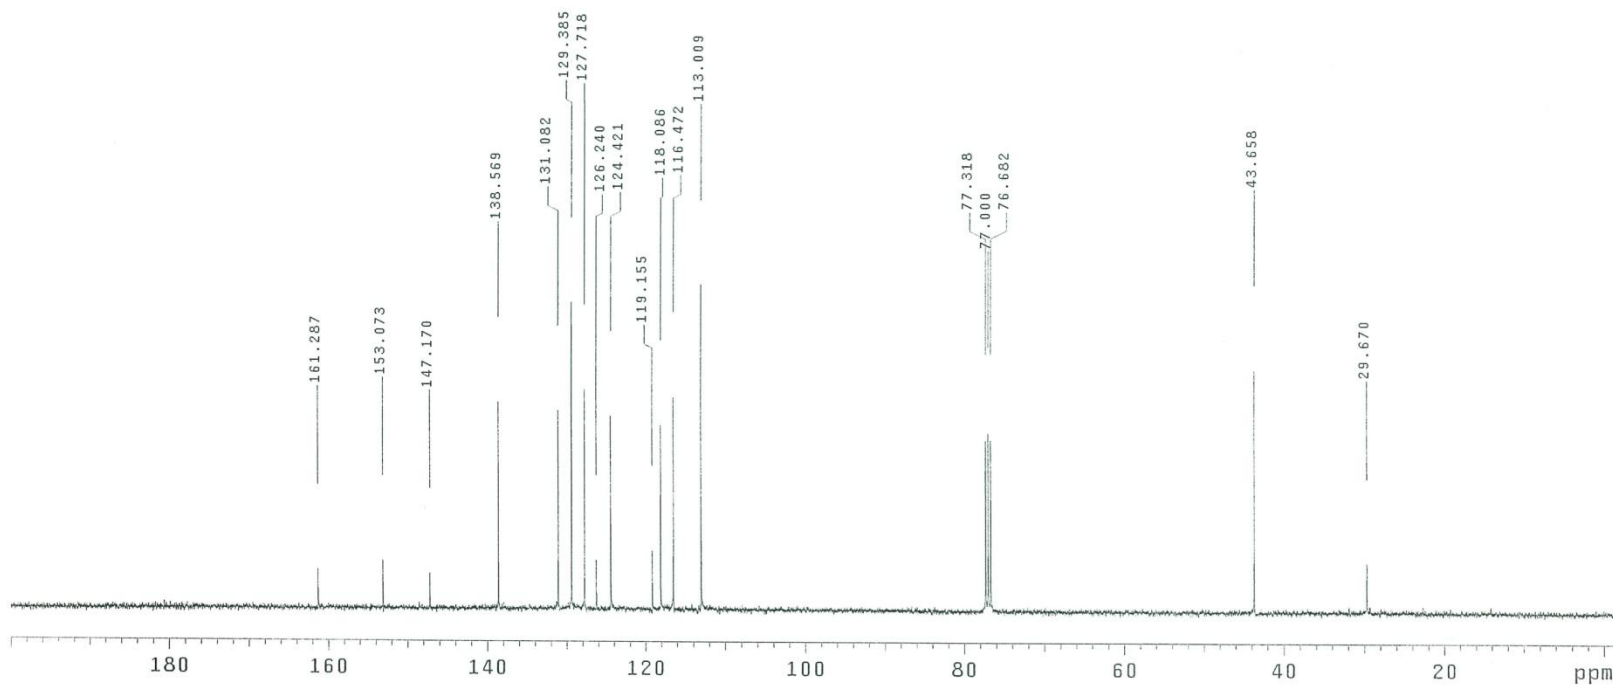

PCA-003

Pulse Sequence: s2pu1

INOVA-400 "unityplus400"

Date: Jul 14 2010

Solvent: CDCl<sub>3</sub>

Ambient temperature

Total 64 repetitions

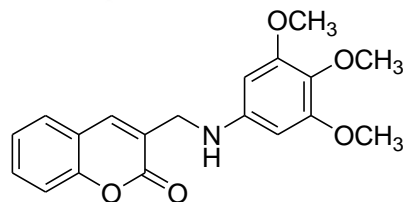

**6**

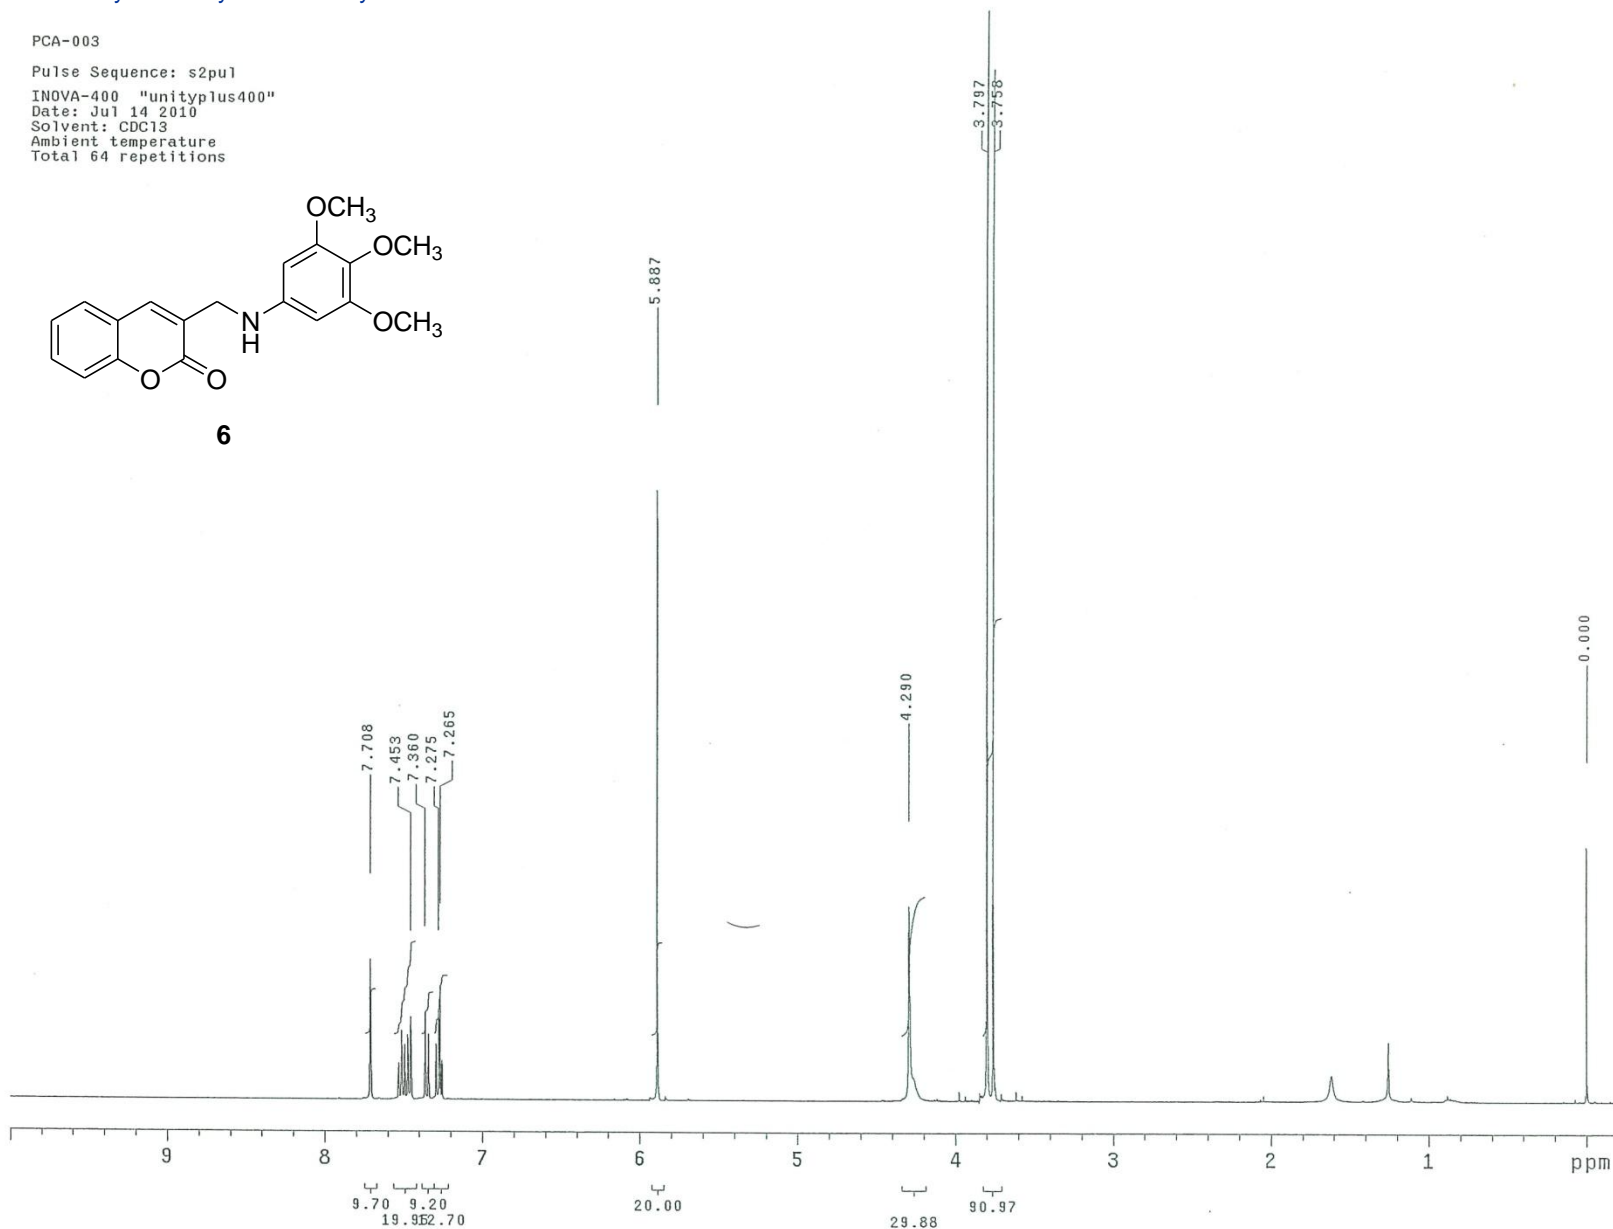

PCA-003

Pulse Sequence: s2pu1

INOVA-400 "unityplus400"

Date: Jul 14 2010

Solvent: CDCl<sub>3</sub>

Ambient temperature

Total 2080 repetitions

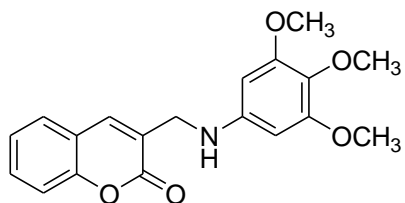

**6**

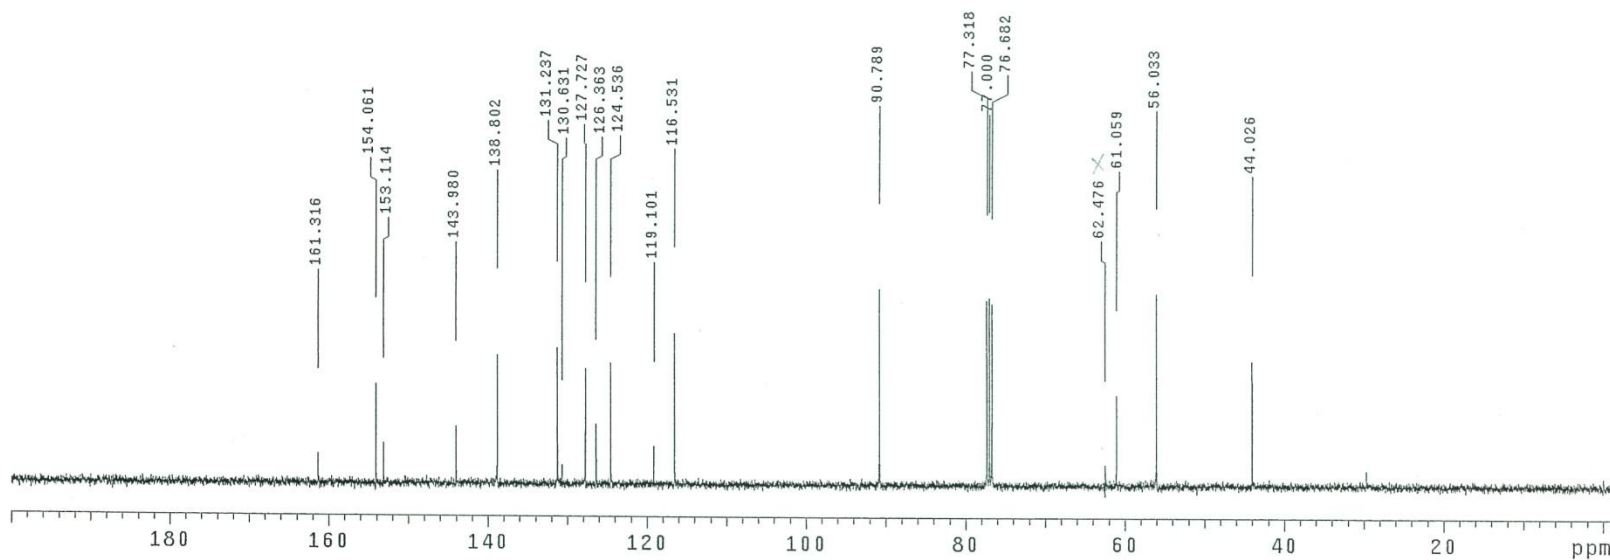

Pulse Sequence: s2pu1  
UNITYplus-400 "unity400"  
Date: Nov 4 2011  
Solvent: CDCl3  
Ambient temperature  
Total 64 repetitions

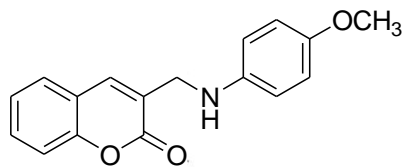

**7**

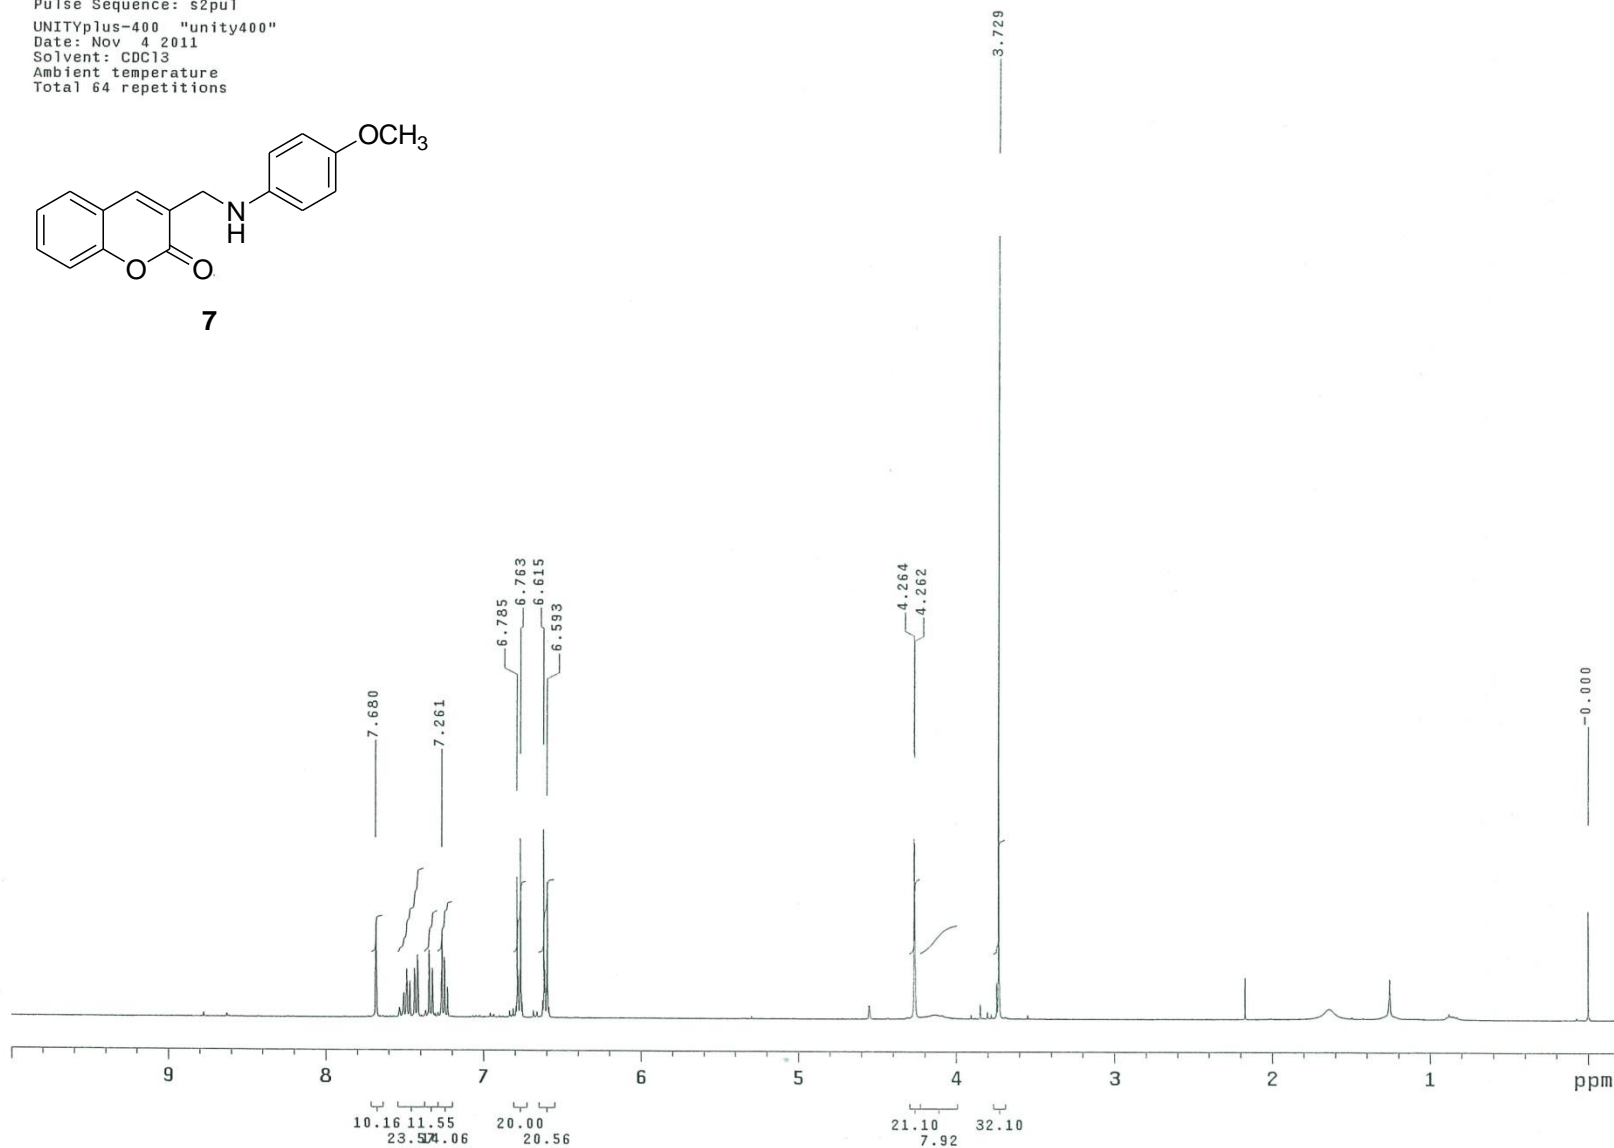

PCA-009

Pulse Sequence: s2pul  
UNITYplus-400 "unity400"  
Date: Nov 4 2011  
Solvent: CDCl<sub>3</sub>  
Ambient temperature  
Total 3680 repetitions

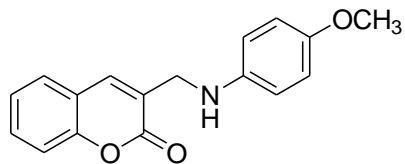

7

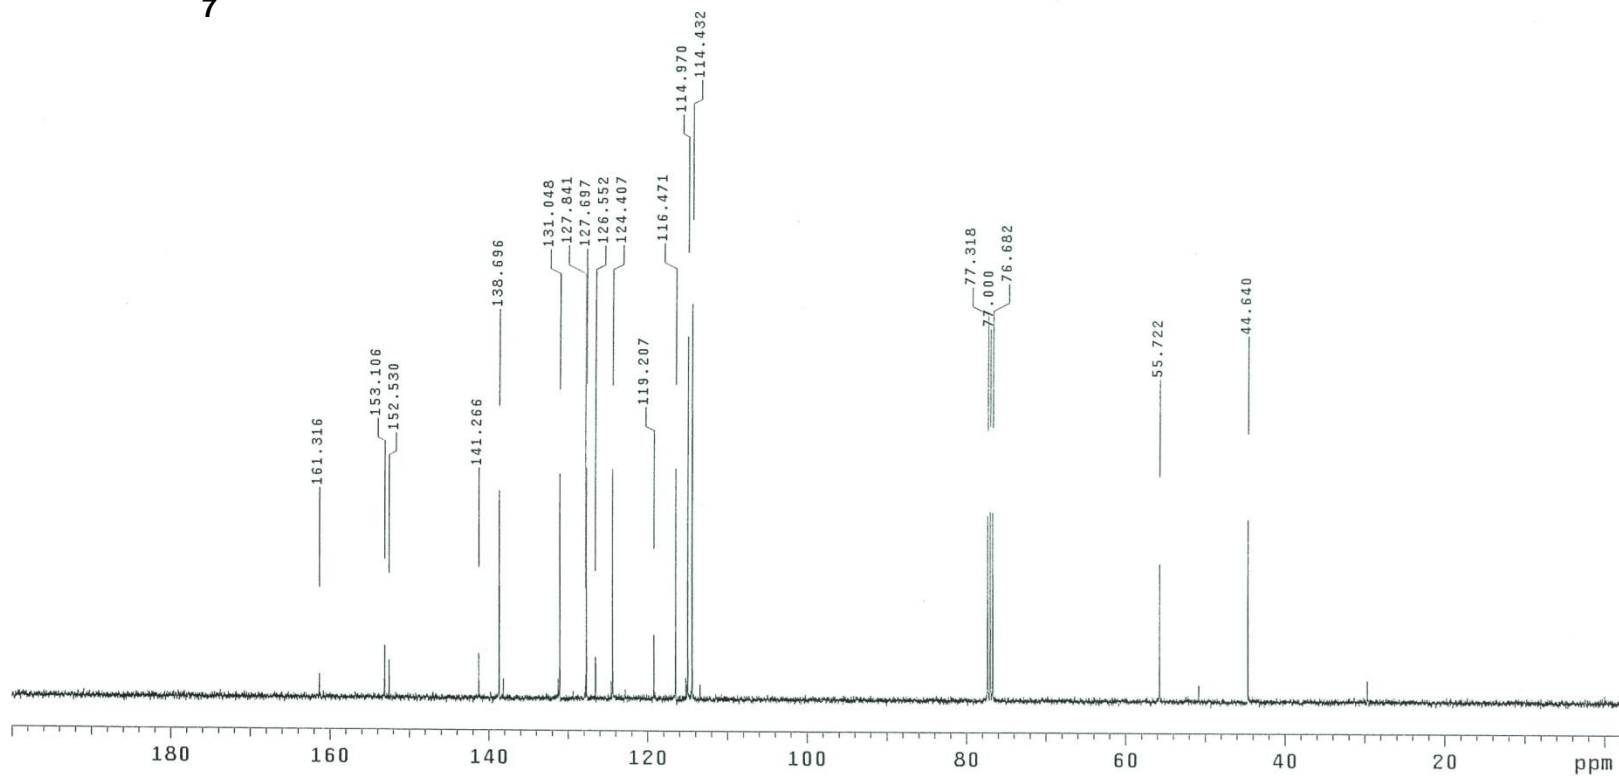

PCA-010

Pulse Sequence: s2pu1

UNITYplus-400 "unity400"

Date: Mar 22 2012

Solvent: CDCl<sub>3</sub>

Ambient temperature

Total 108 repetitions

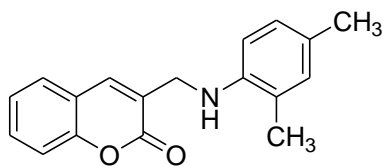

**8**

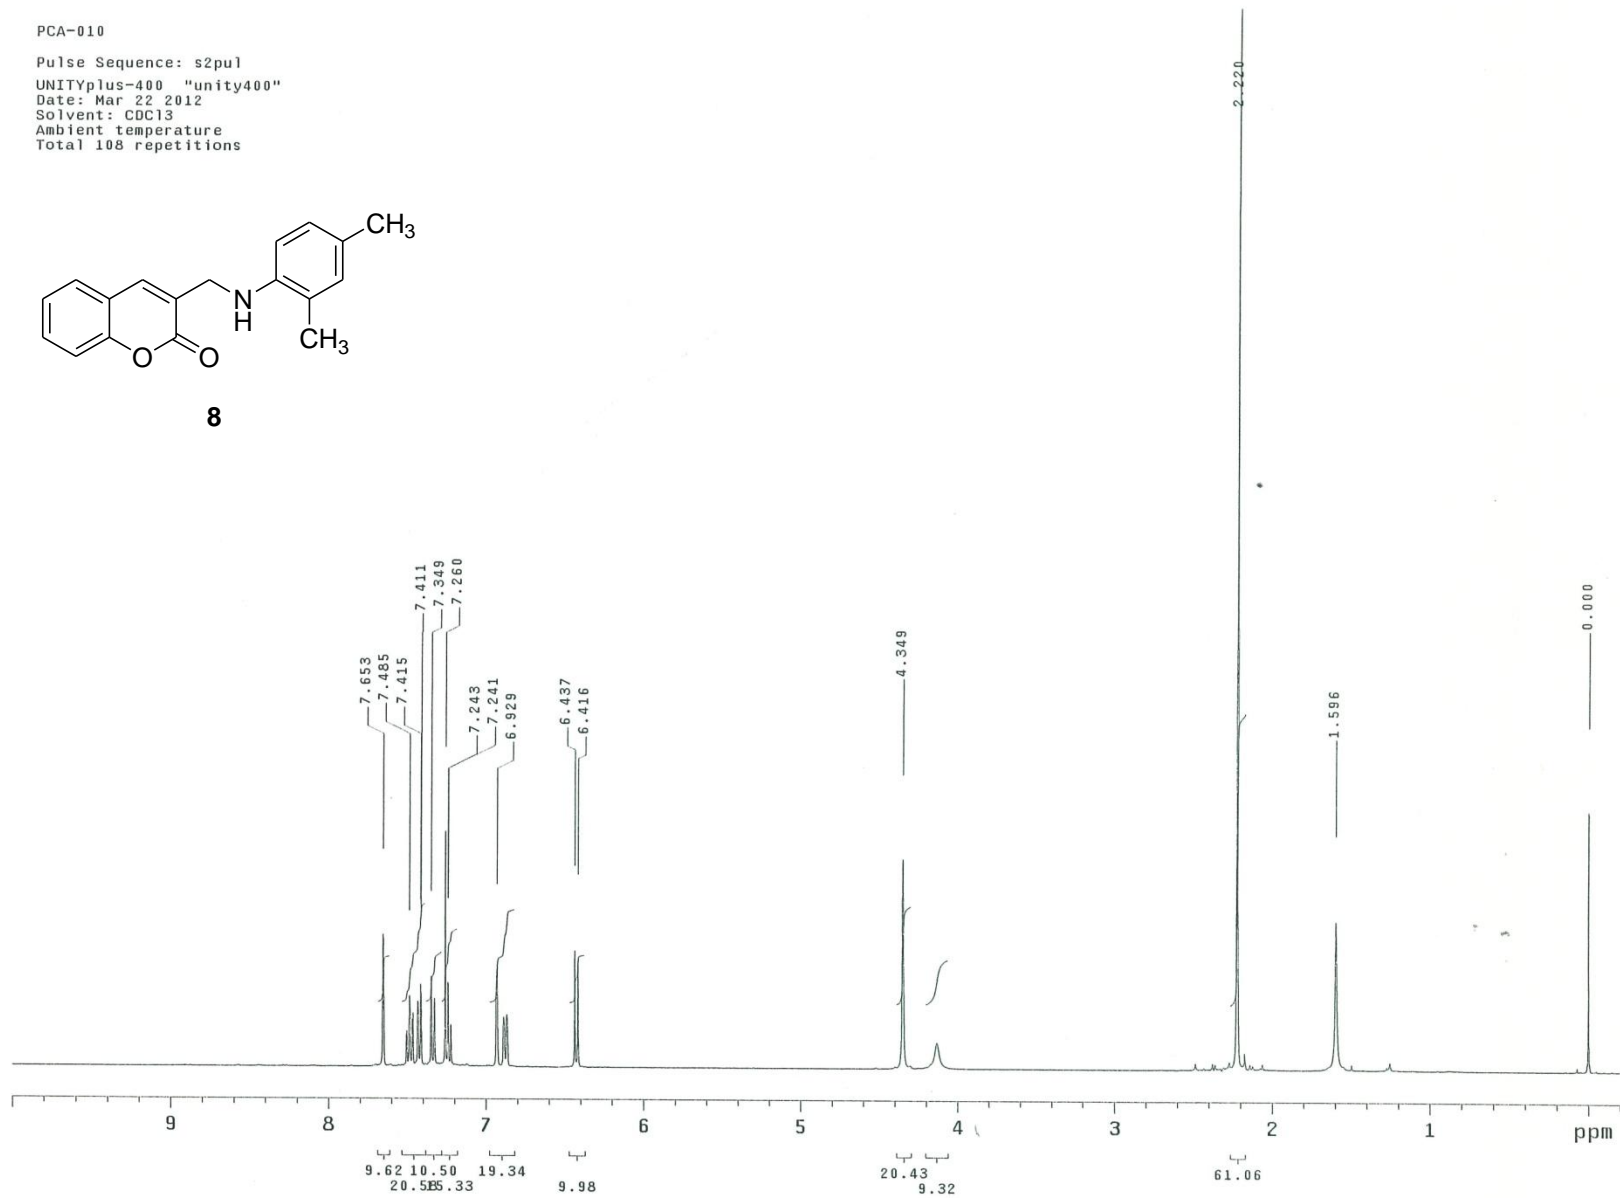

PCA-010

Pulse Sequence: s2pul

UNITYplus-400 "unity400"

Date: Mar 22 2012

Solvent: CDCl<sub>3</sub>

Ambient temperature

Total 4464 repetitions

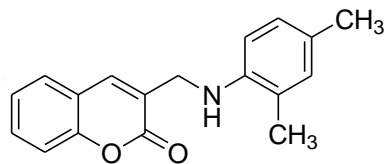

**8**

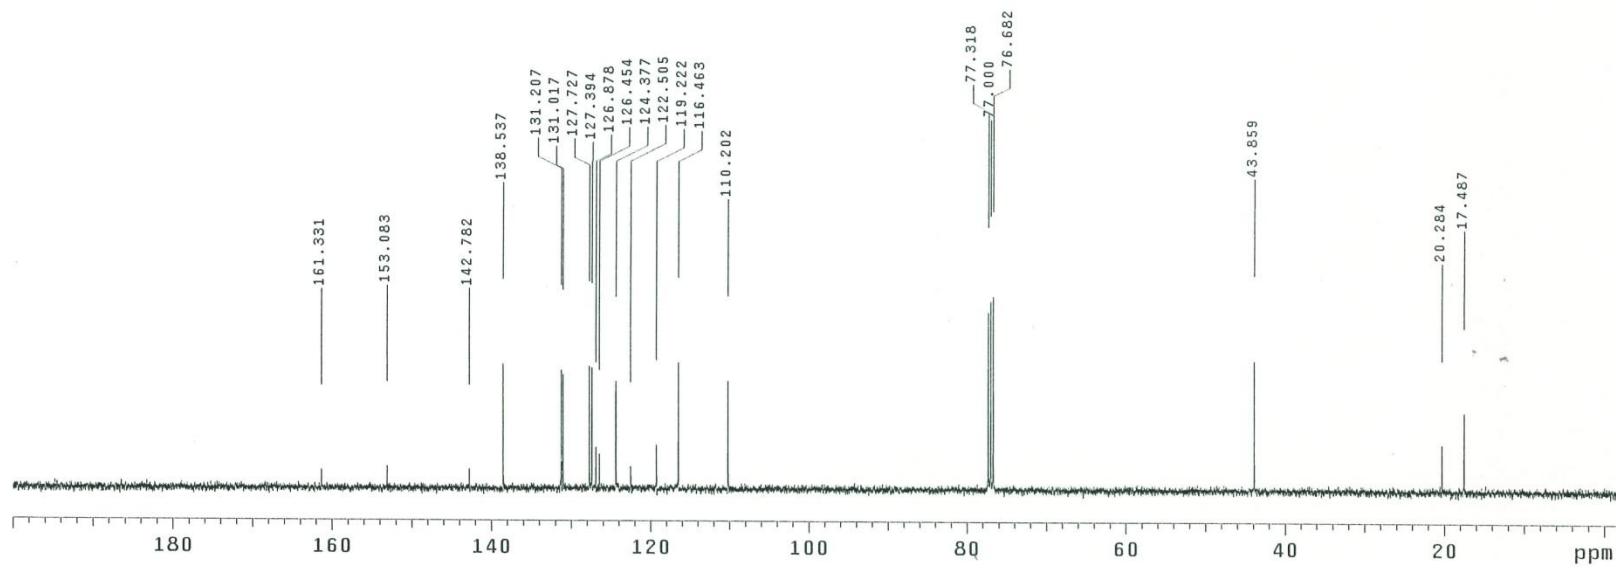



PCA-006

Pulse Sequence: s2pu1

UNITYplus-400 "unity400"

Date: Nov 4 2011

Solvent: CDCl<sub>3</sub>

Ambient temperature

Total 80 repetitions

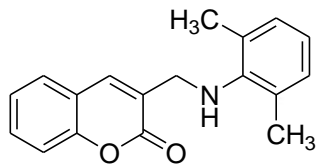

**9**

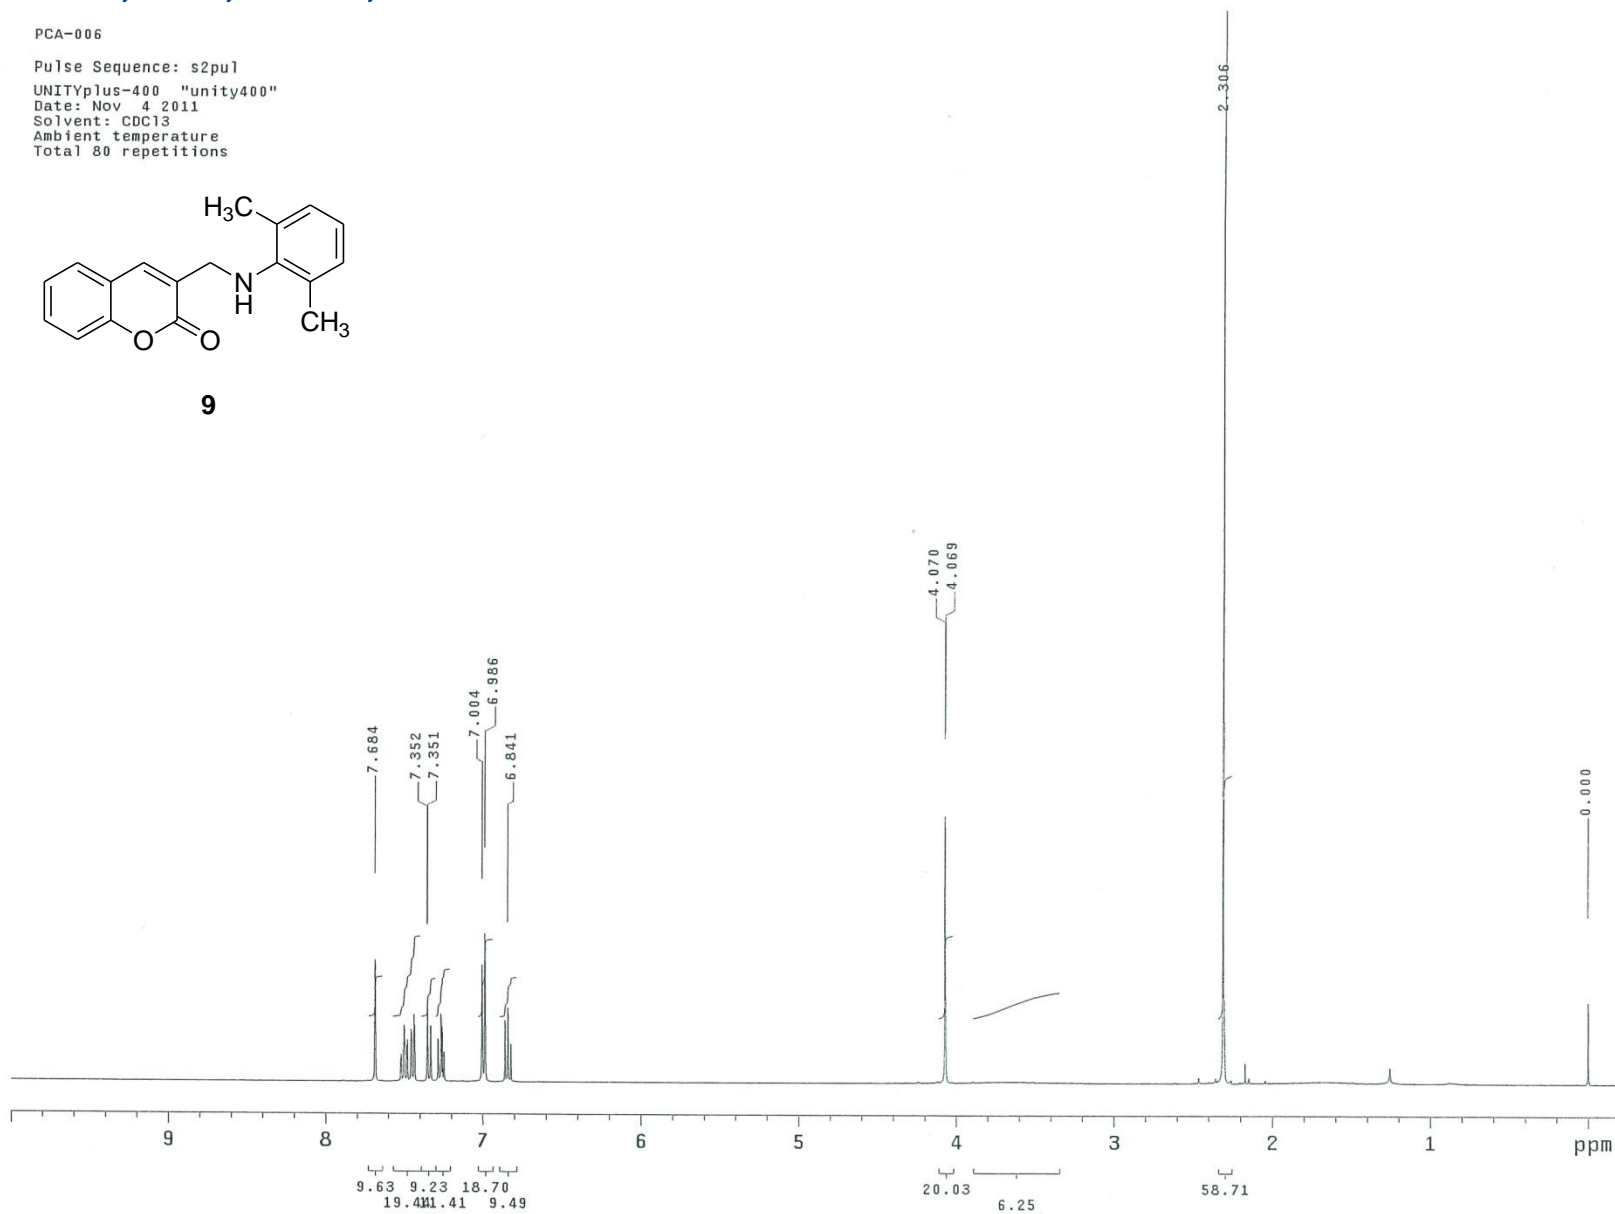

PCA-006

Pulse Sequence: s2pul

UNITYplus-400 "unity400"

Date: Nov 4 2011

Solvent: CDCl<sub>3</sub>

Ambient temperature

Total 2336 repetitions

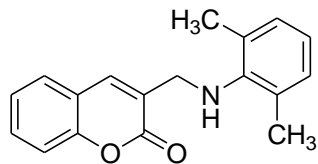

**9**

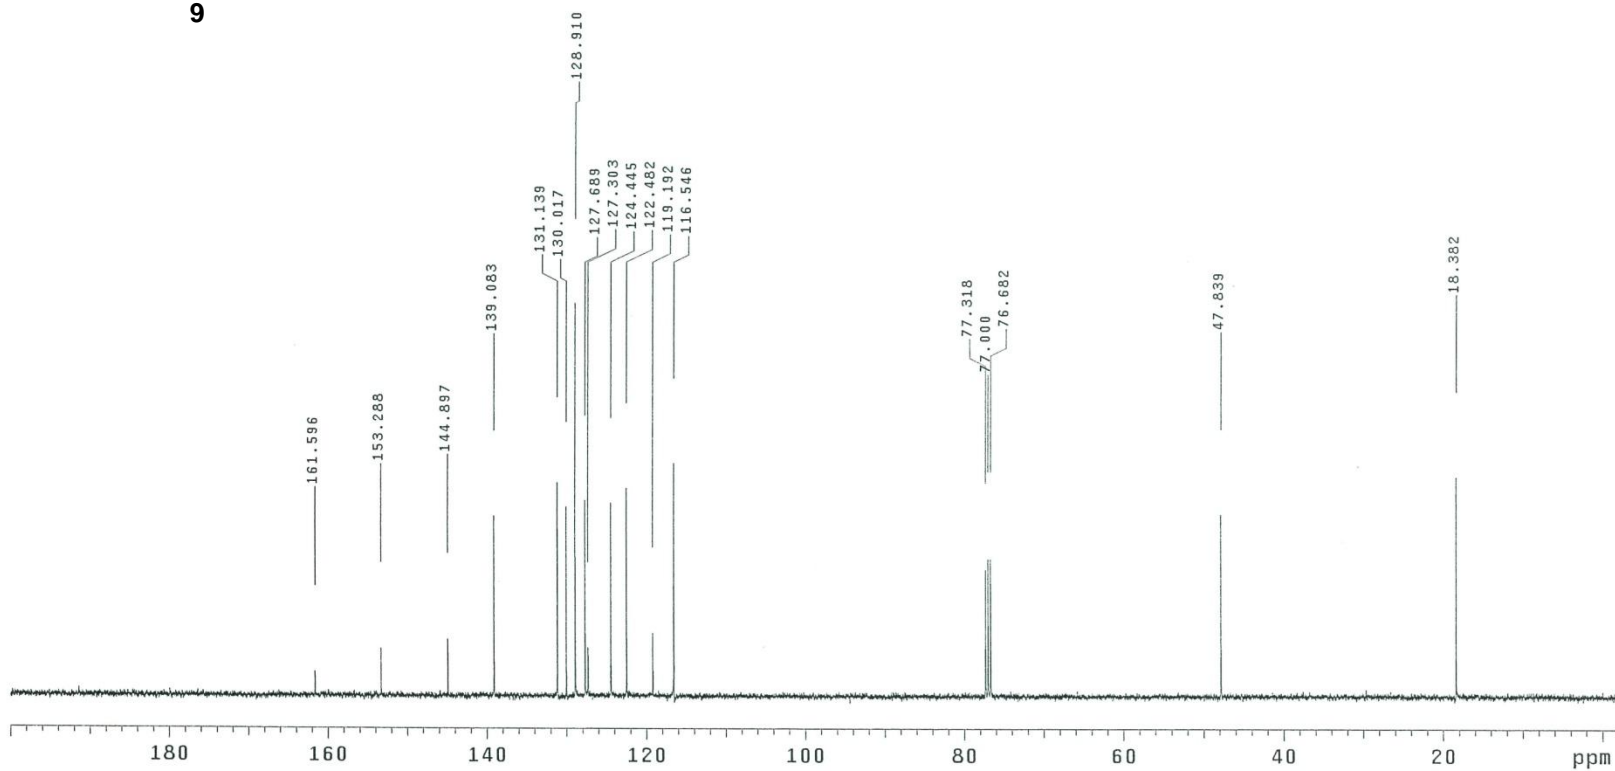

PCA-019

Pulse Sequence: s2pu1

UNITYplus-400 "unity400"

Date: Dec 13 2011

Solvent: Acetone

Ambient temperature

Total 80 repetitions

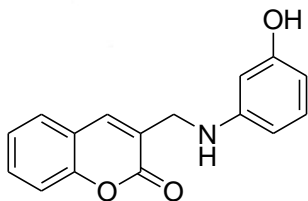

10

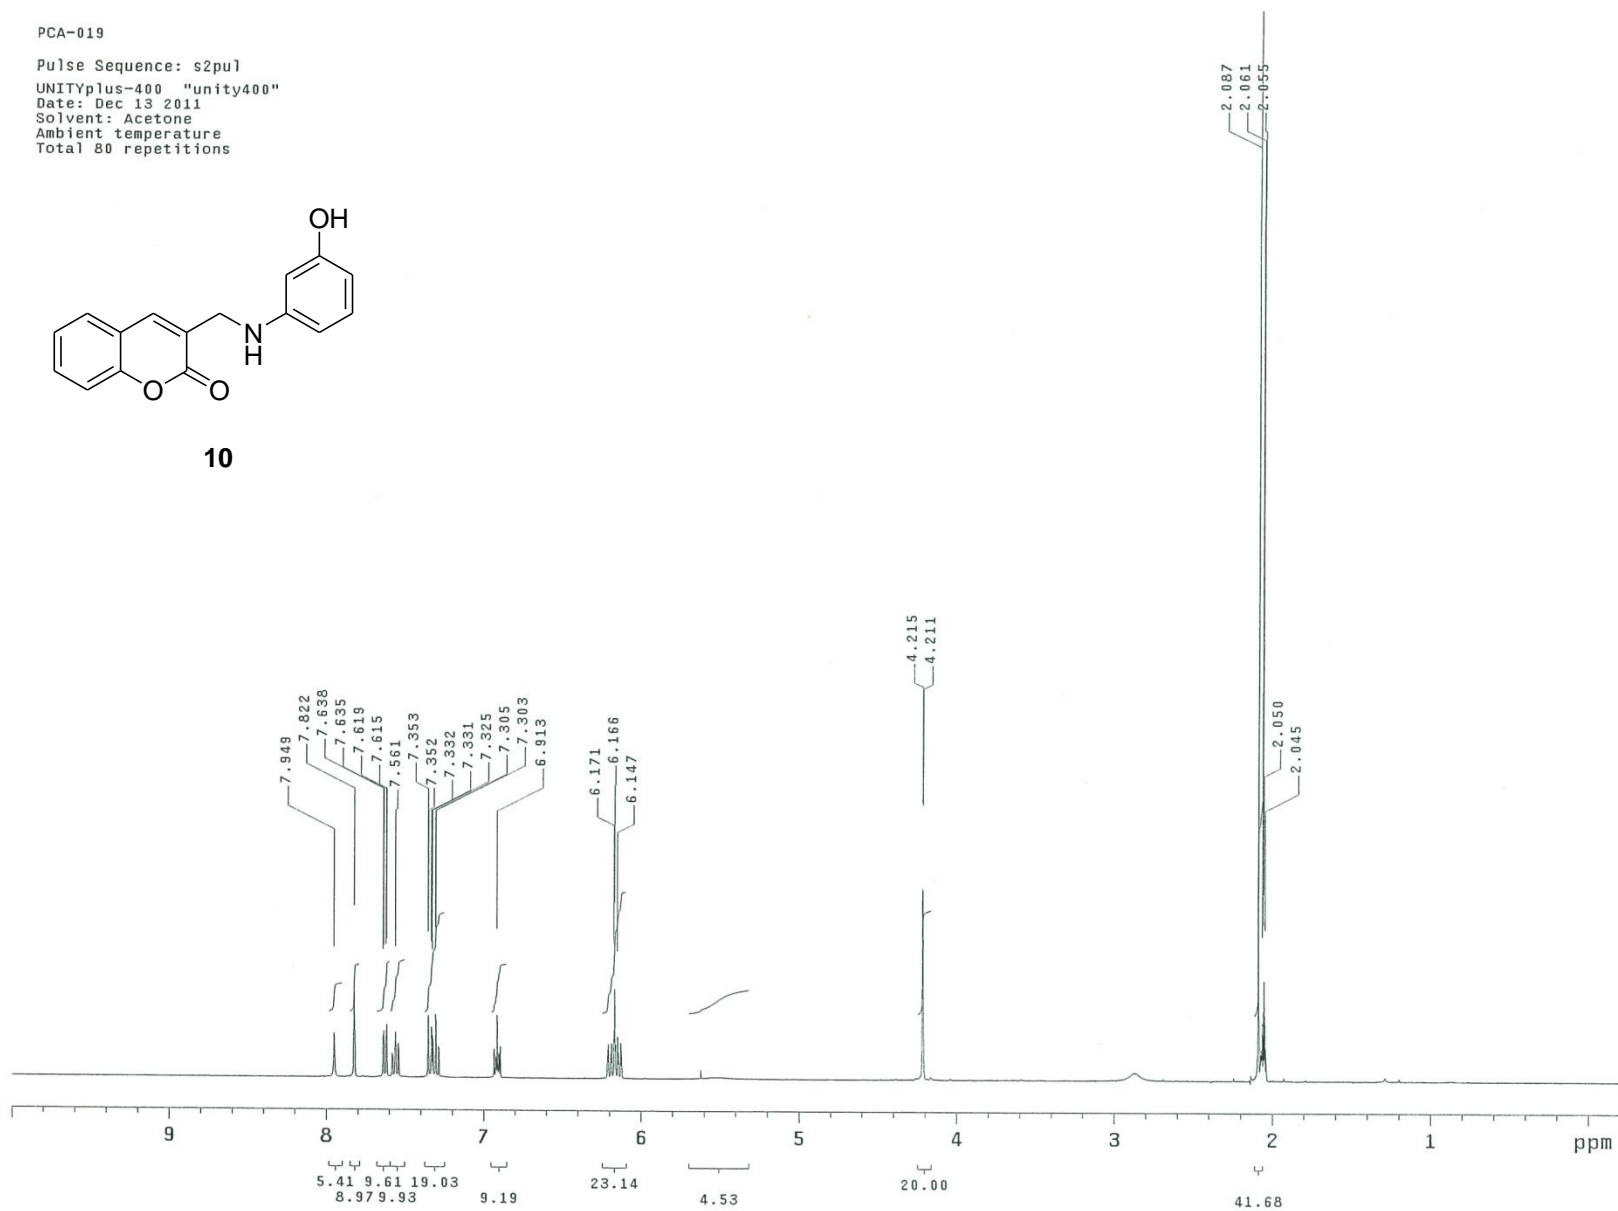

PCA-019

Pulse Sequence: s2pul  
UNITYplus-400 "unity400"  
Date: Dec 13 2011  
Solvent: Acetone  
Ambient temperature  
Total 2048 repetitions

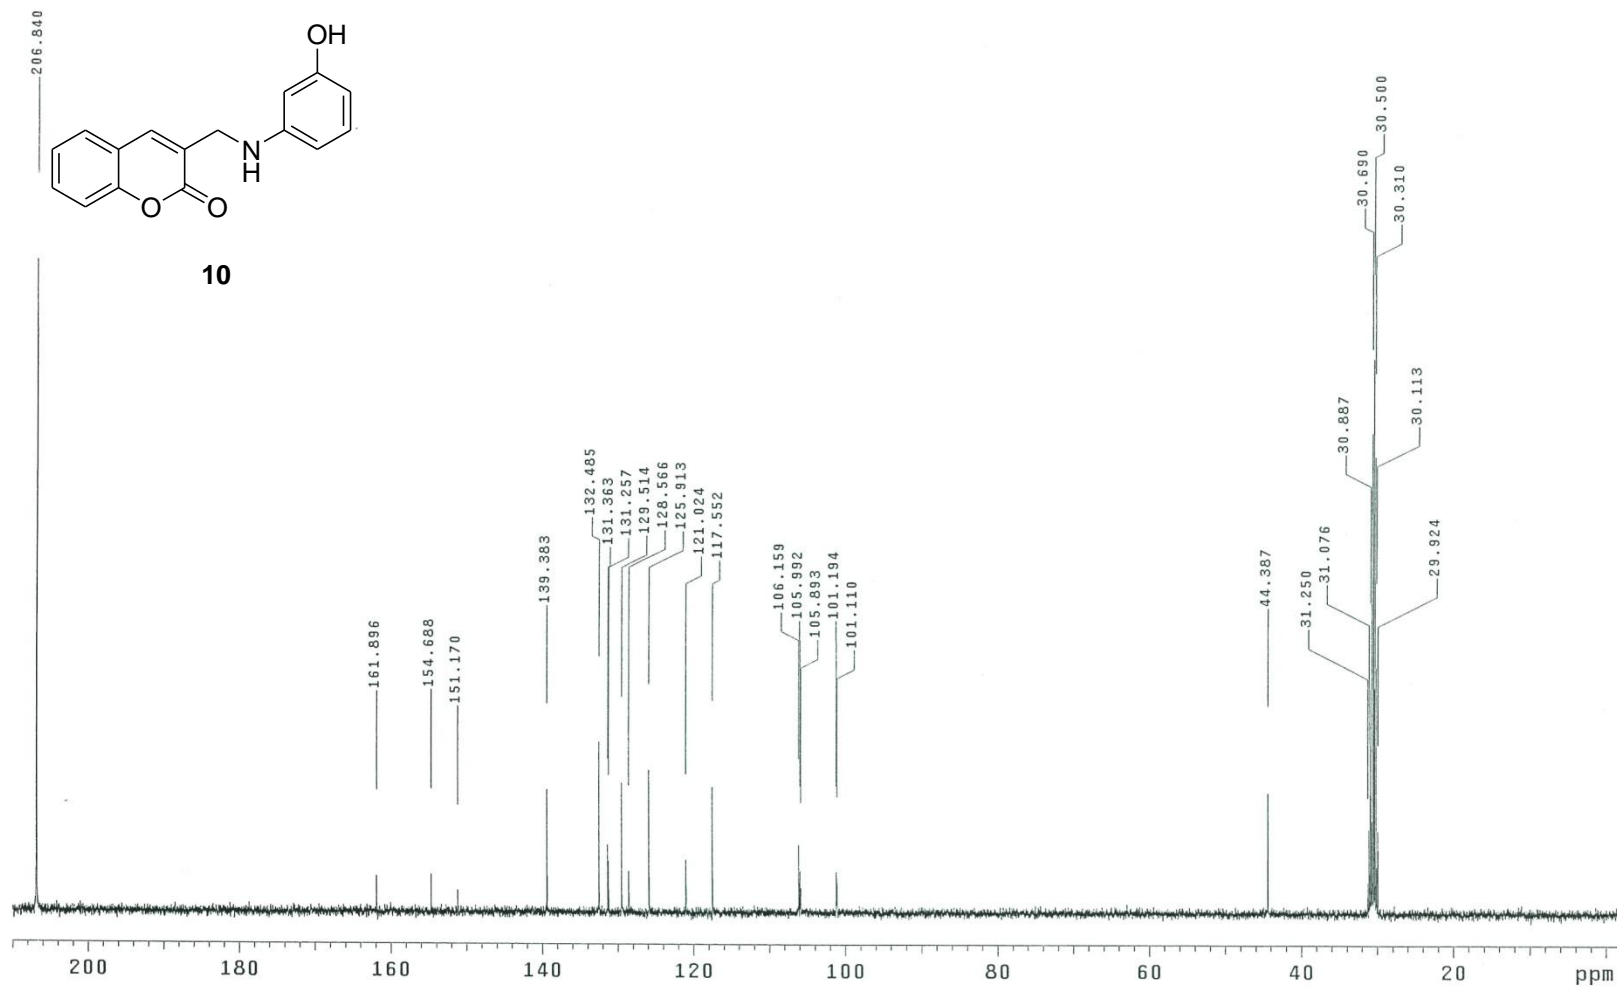

PCA-016

Mercury-400BB "Mercuryplus400"  
Date: Jan 16 2012  
Solvent: CDCl<sub>3</sub>  
Ambient temperature  
Total 32 repetitions

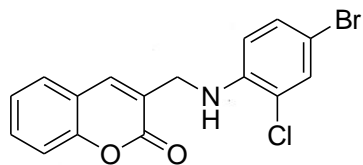

11

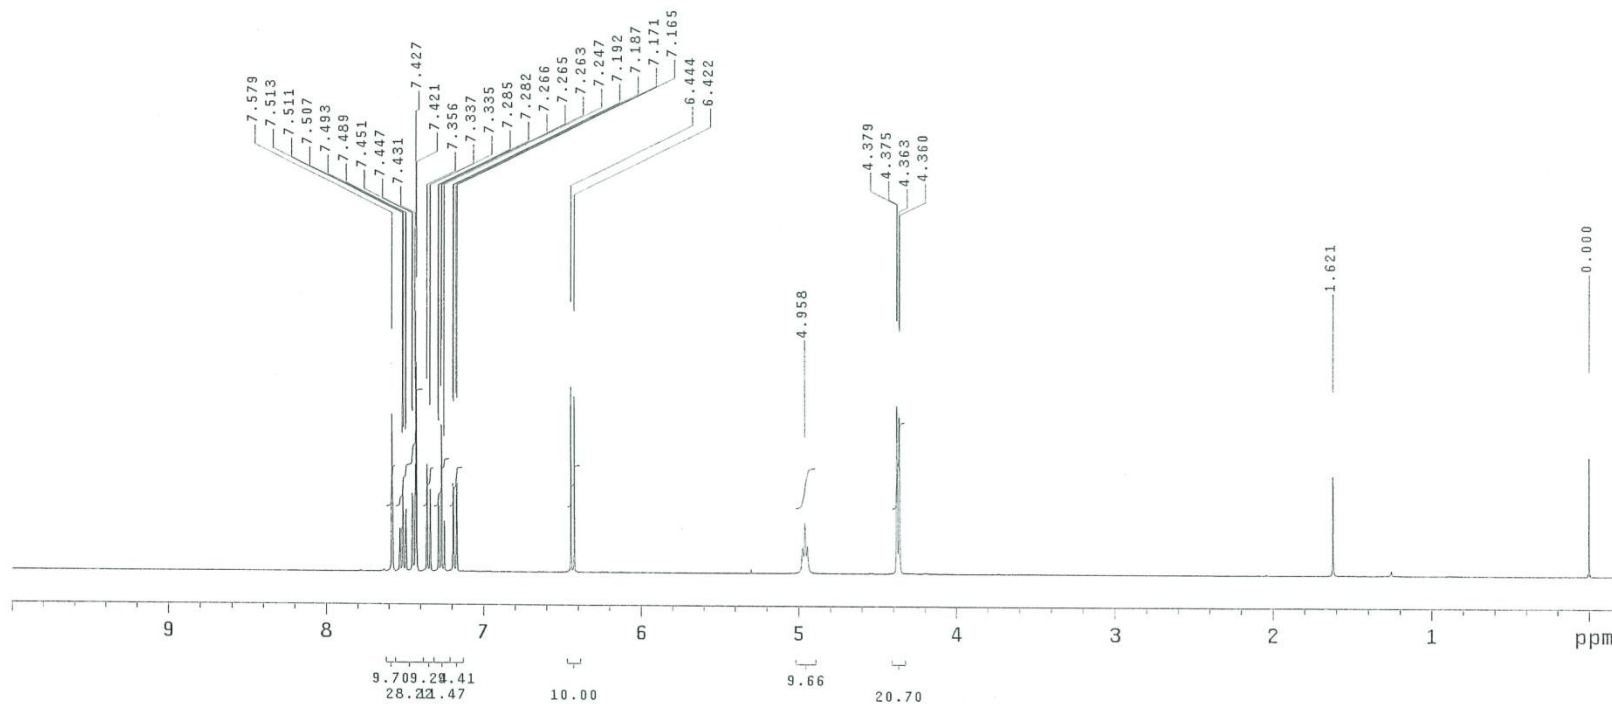

PCA-016

Mercury-400BB "Mercuryplus400"  
Date: Jan 16 2012  
Solvent: CDCl<sub>3</sub>  
Ambient temperature  
Total 32000 repetitions

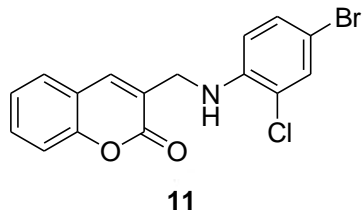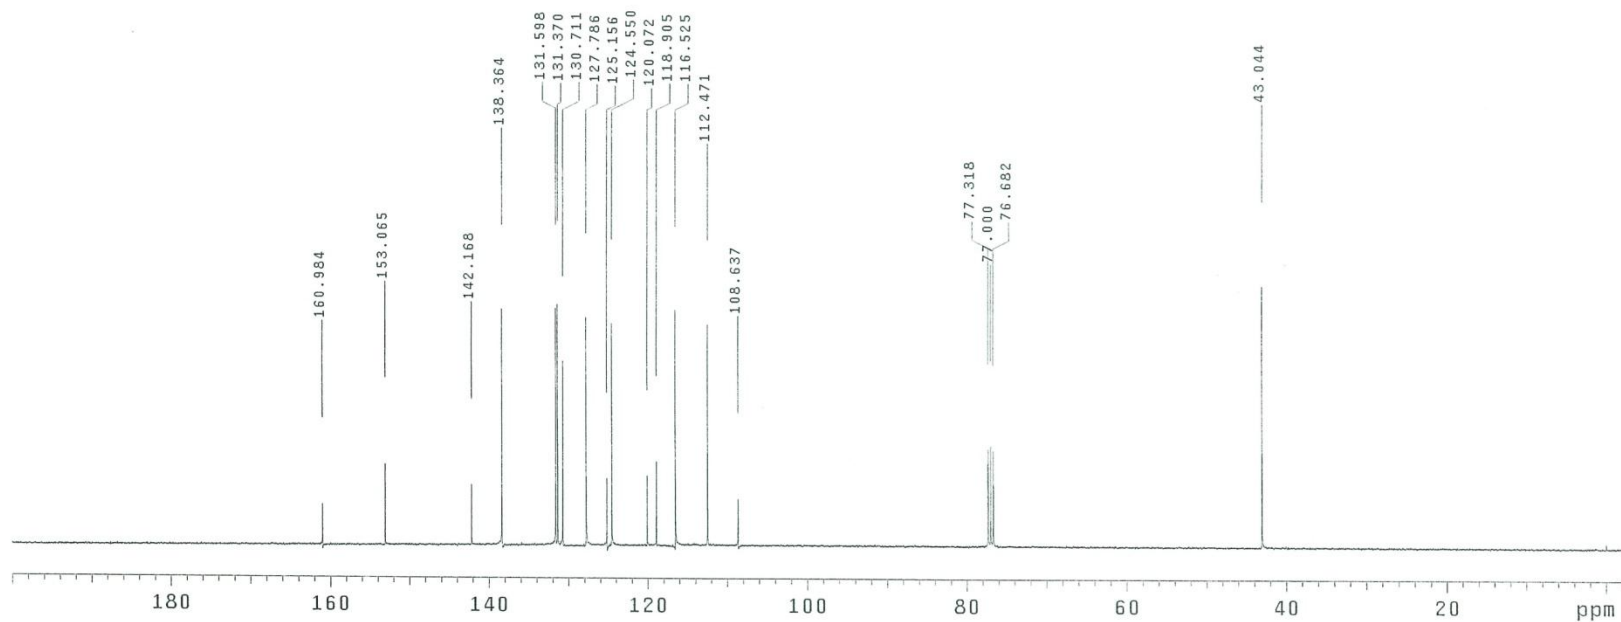

PCA-005

Pulse Sequence: s2pu1

INOVA-400 "unityplus400"

Date: Jul 14 2010

Solvent: CDCl<sub>3</sub>

Ambient temperature

Total 64 repetitions

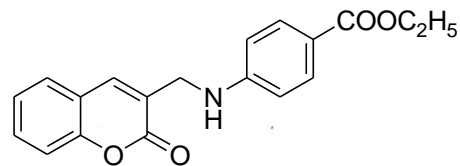

12

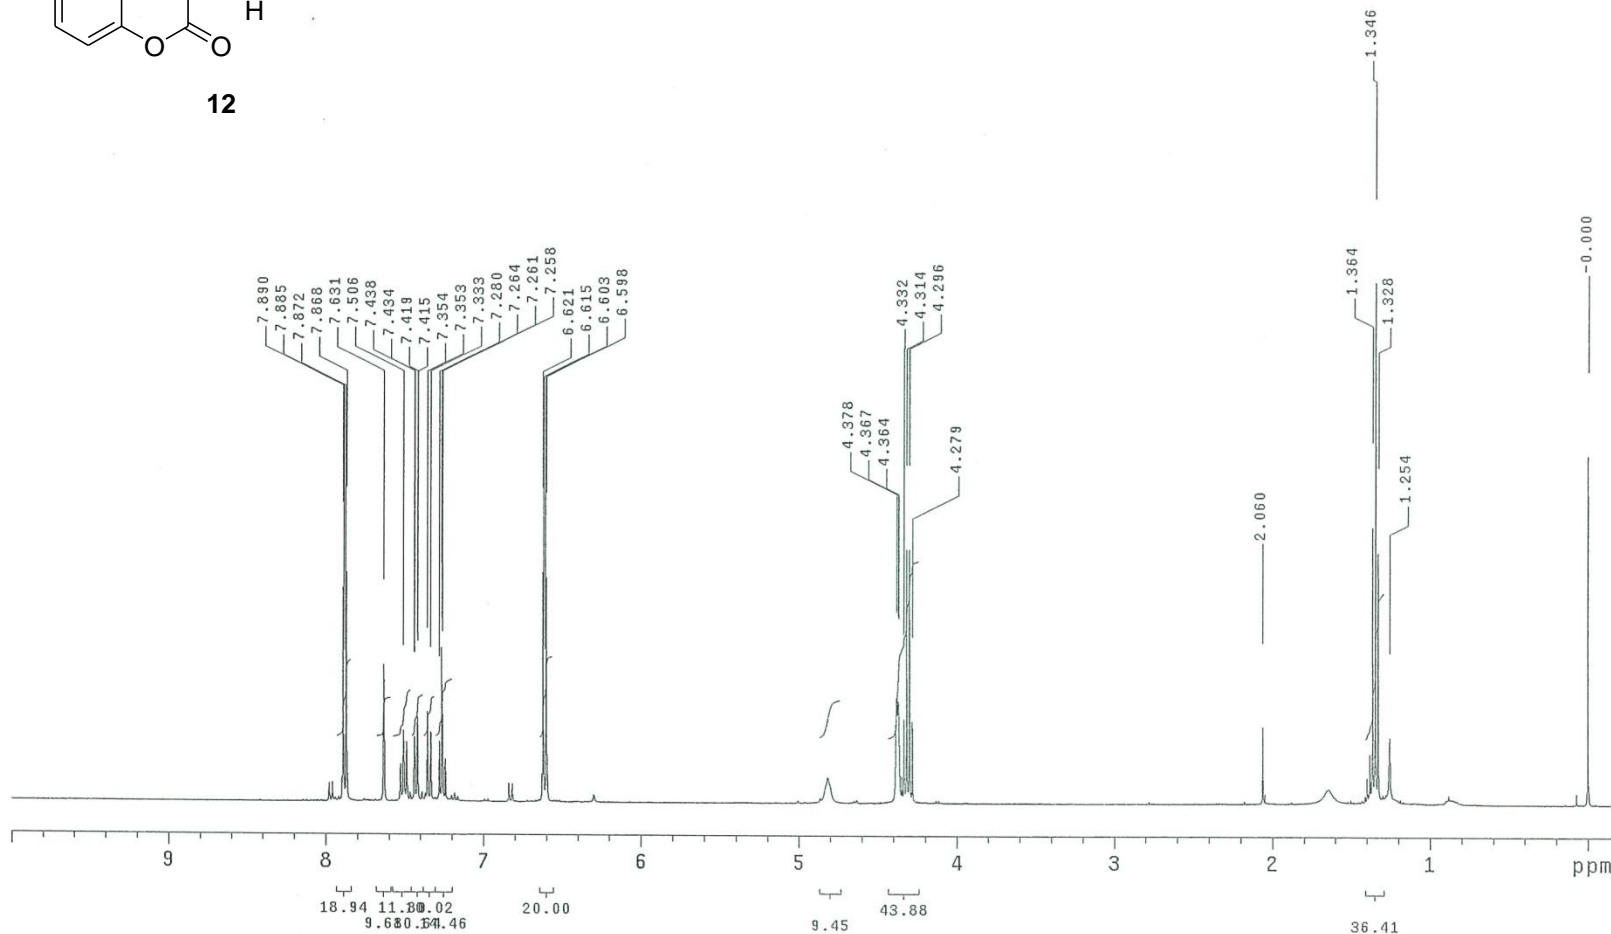

PCA-005

Pulse Sequence: s2pu1

INQVA-400 "unityplus400"

Date: Jul 14 2010

Solvent: CDCl<sub>3</sub>

Ambient temperature

Total 2848 repetitions

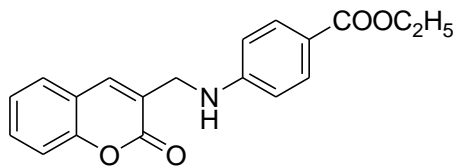

**12**

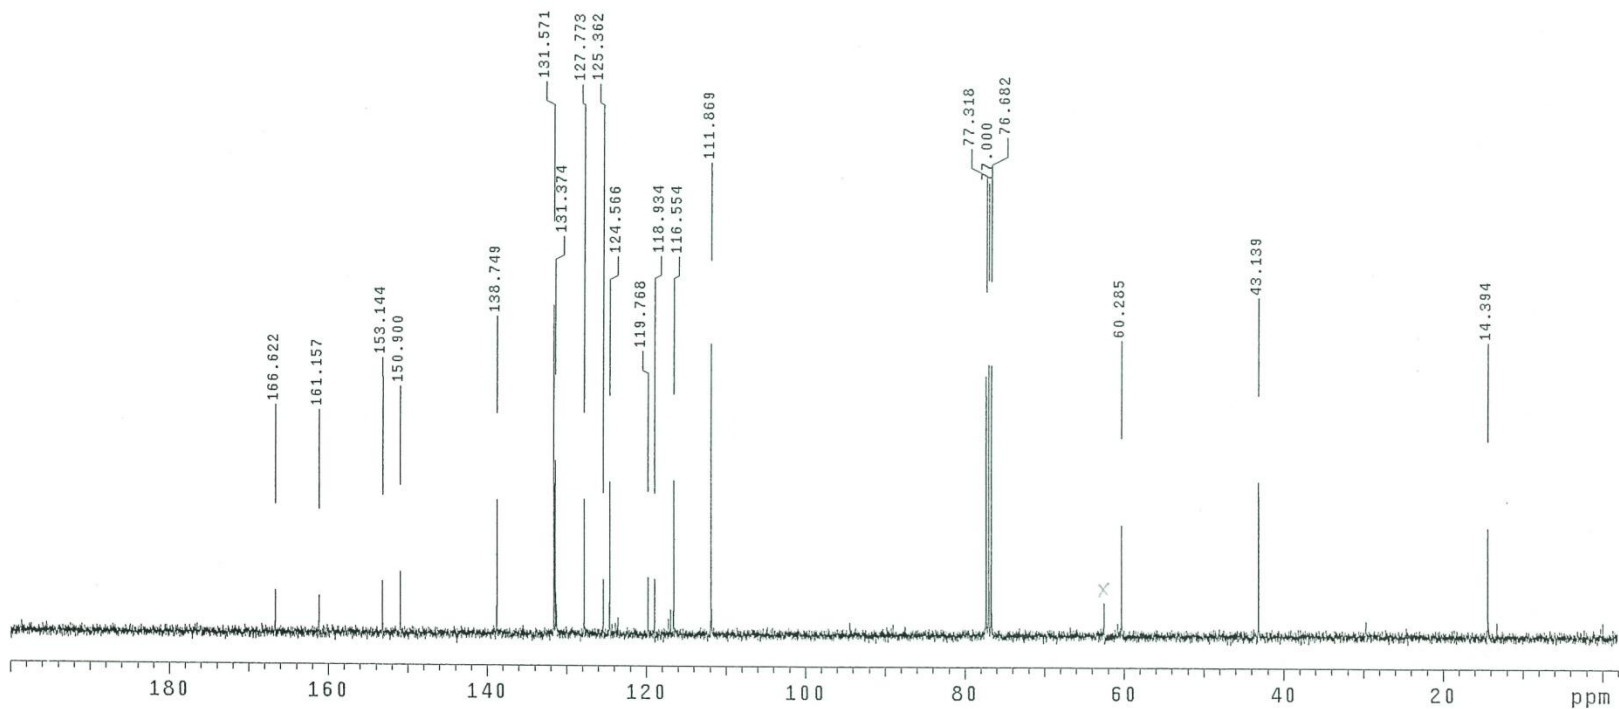



PCA-001

Pulse Sequence: s2pu1

UNITYplus-400 "unity400"

Date: Nov 4 2011

Solvent: DMSO

Ambient temperature

Total 64 repetitions

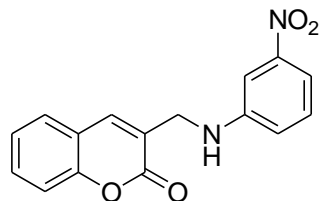

13

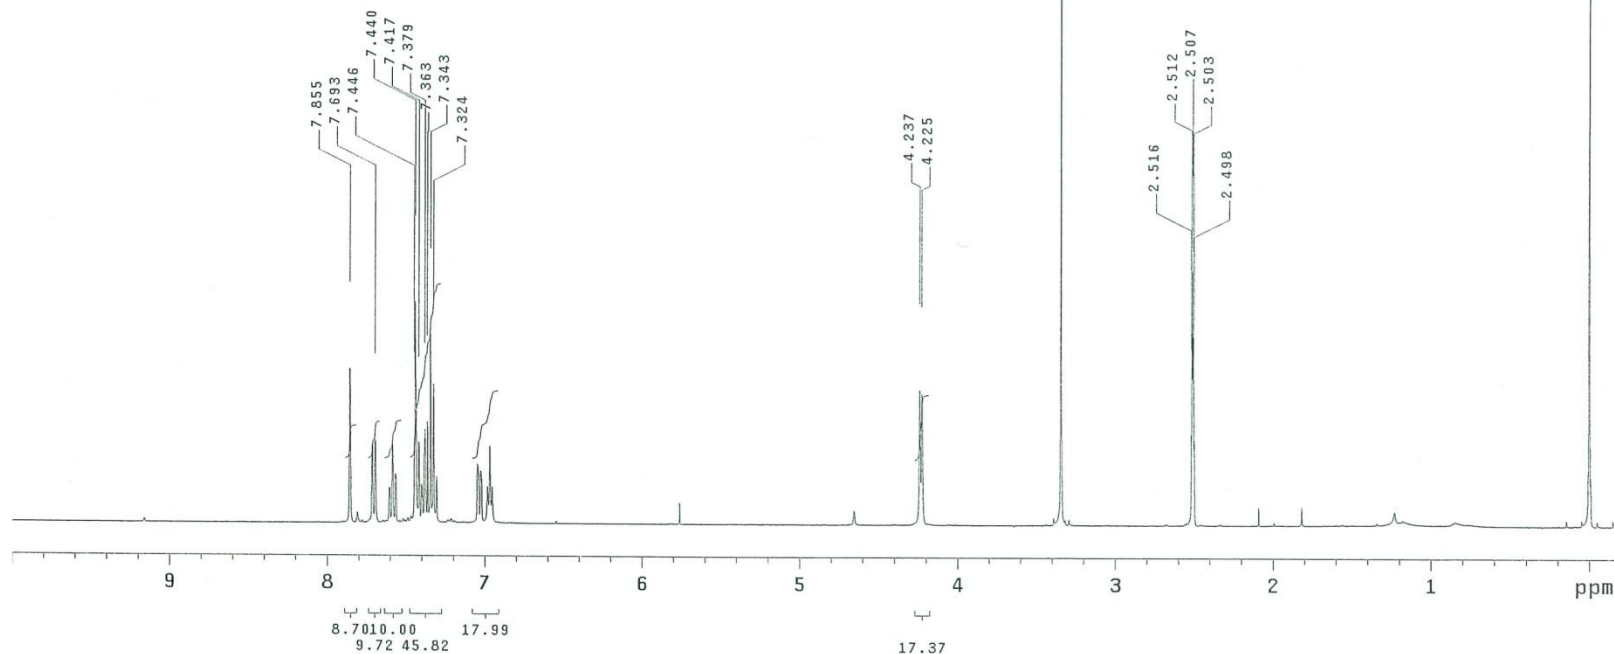

PCA-001

Pulse Sequence: s2pu1

UNITYplus-400 "unity400"

Date: Nov 4 2011

Solvent: DMSO

Ambient temperature

Total 2816 repetitions

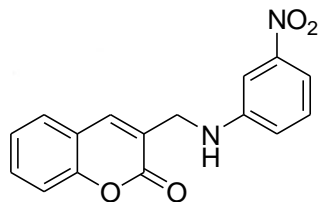

**13**

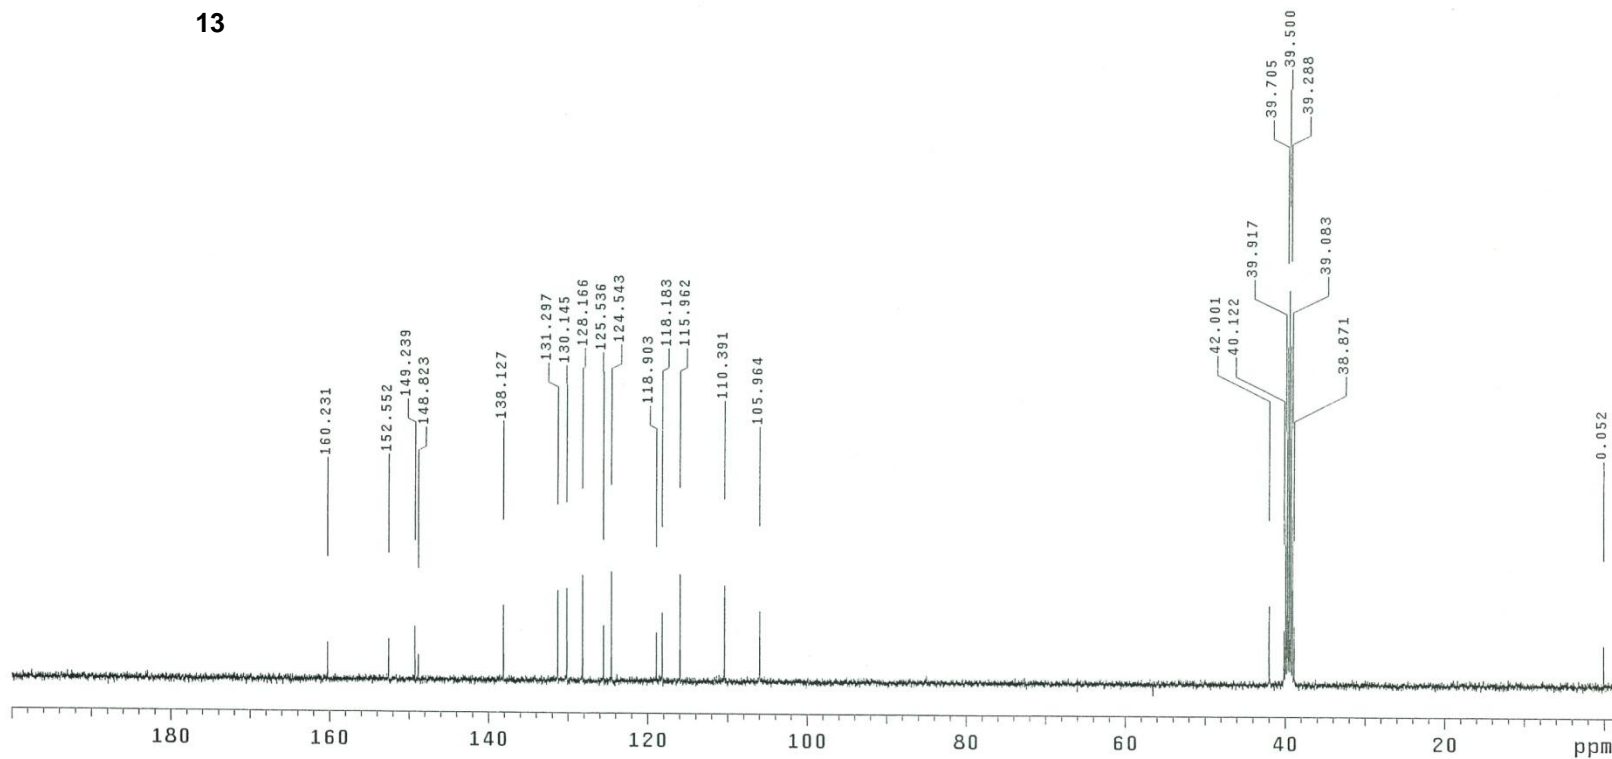

PCA-013

Pulse Sequence: s2pu1

UNITYplus-400 "unity400"

Date: Dec 13 2011

Solvent: Acetone

Ambient temperature

Total 64 repetitions

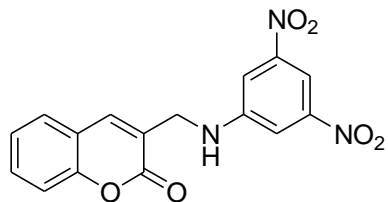

14

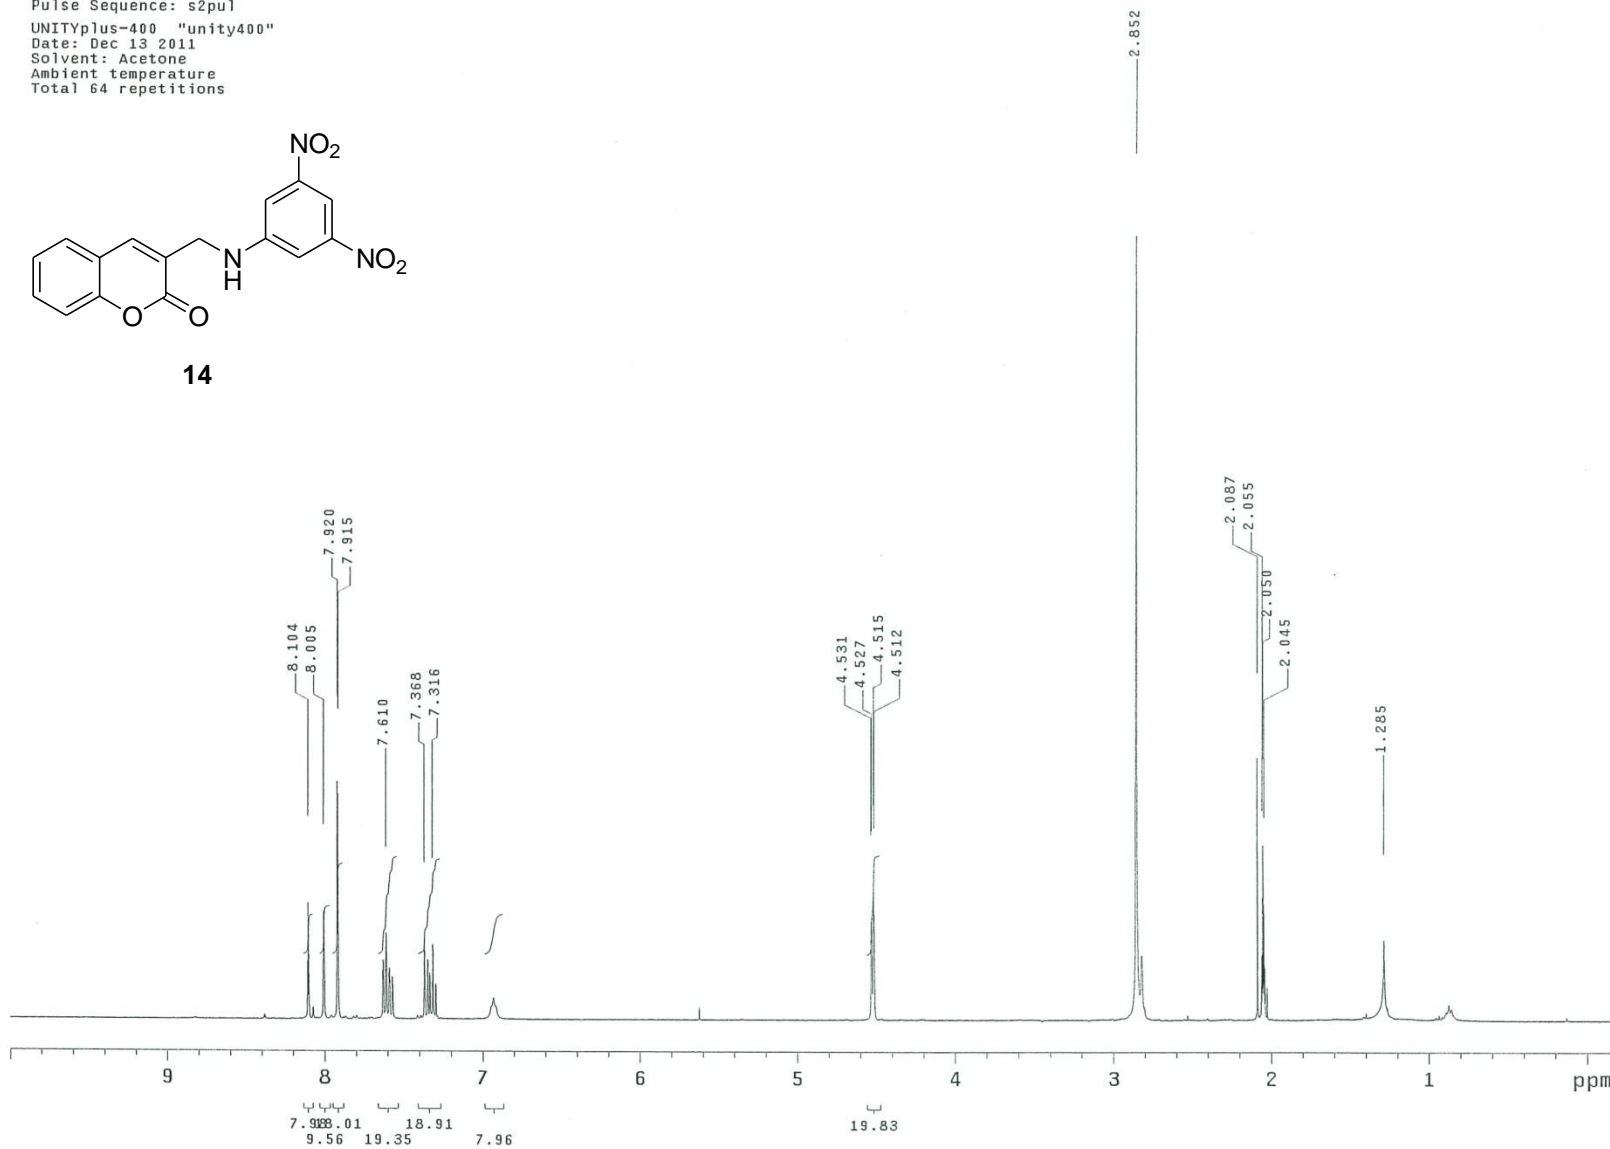

PCA-013

Pulse Sequence: s2pu1  
UNITYplus-400 "unity400"  
Date: Dec 13 2011  
Solvent: Acetone  
Ambient temperature  
Total 8016 repetitions

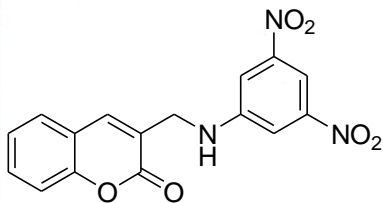

**14**

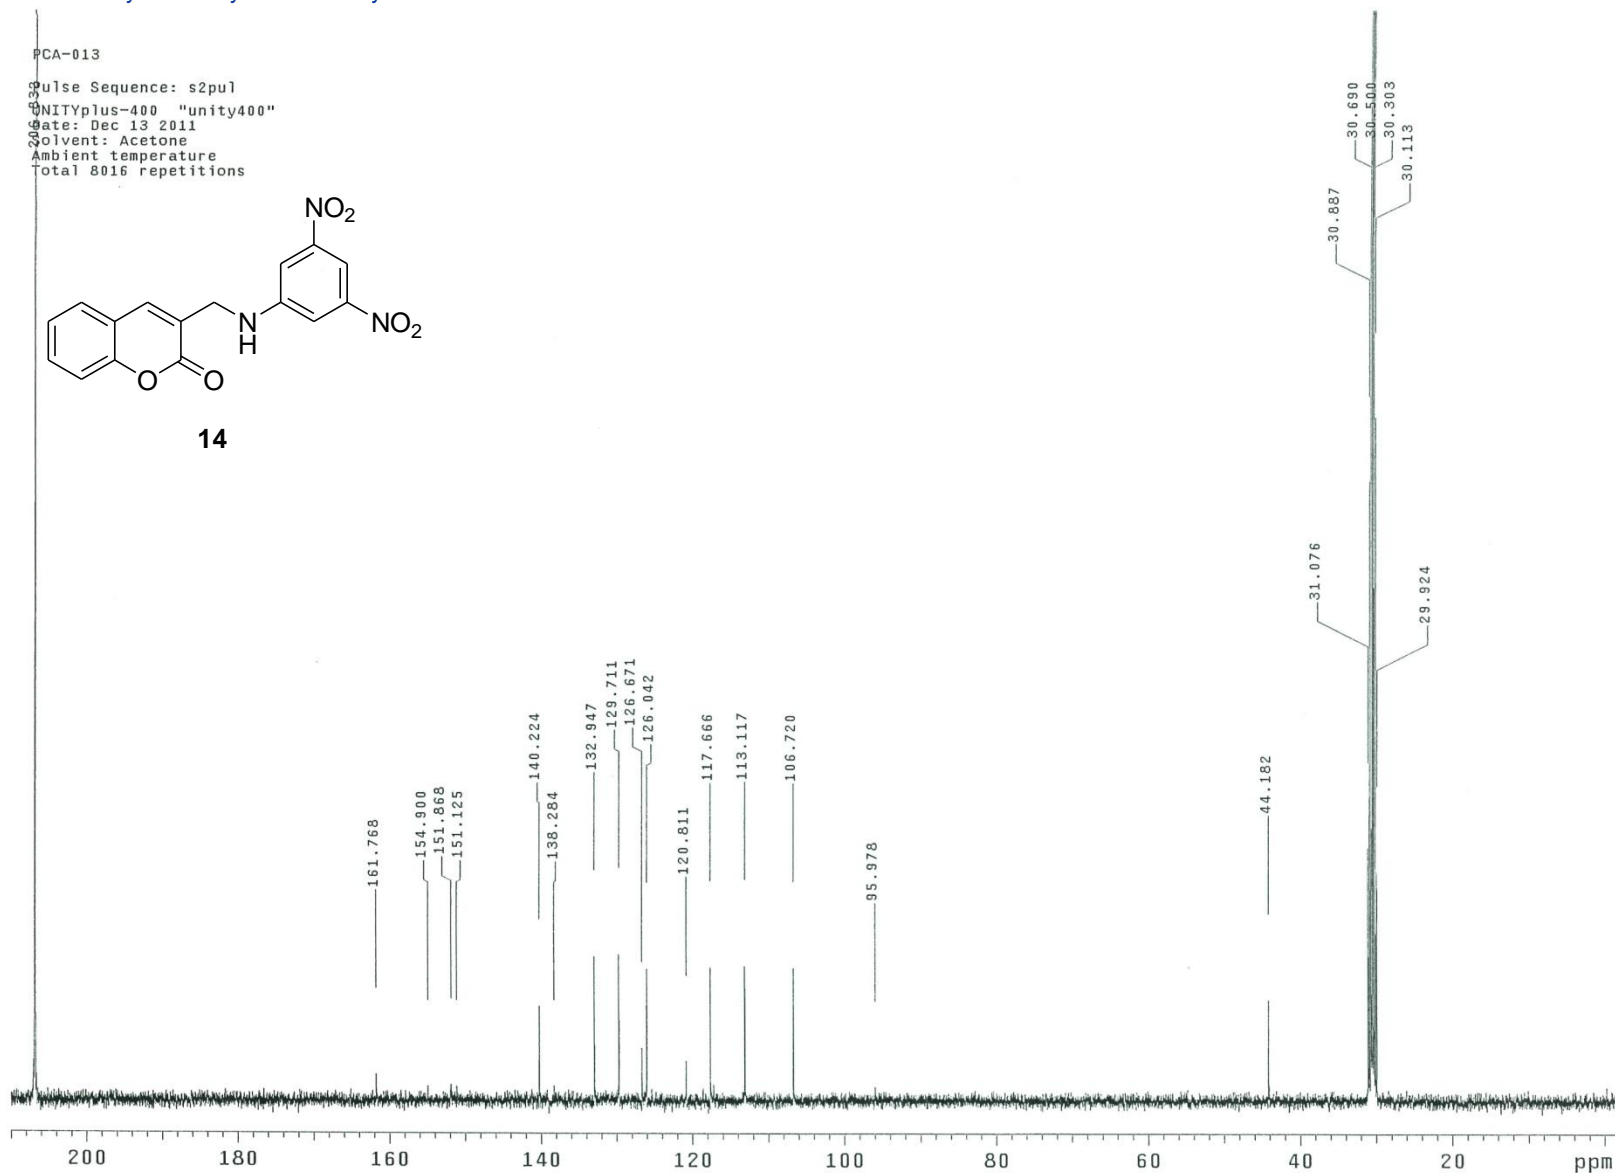

PCA-017

Pulse Sequence: s2pul

Solvent: CDCl<sub>3</sub>

Ambient temperature

UNITYplus-400 "unity400"

Pulse 49.3 degrees

Acq. time 3.744 sec

Width 6000.6 Hz

48 repetitions

OBSERVE H1, 400.2809034 MHz

DATA PROCESSING

FT size 65536

Total time 4 min, 0 sec

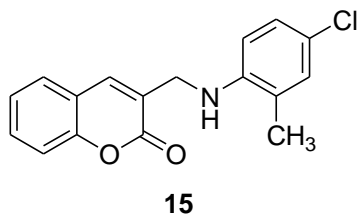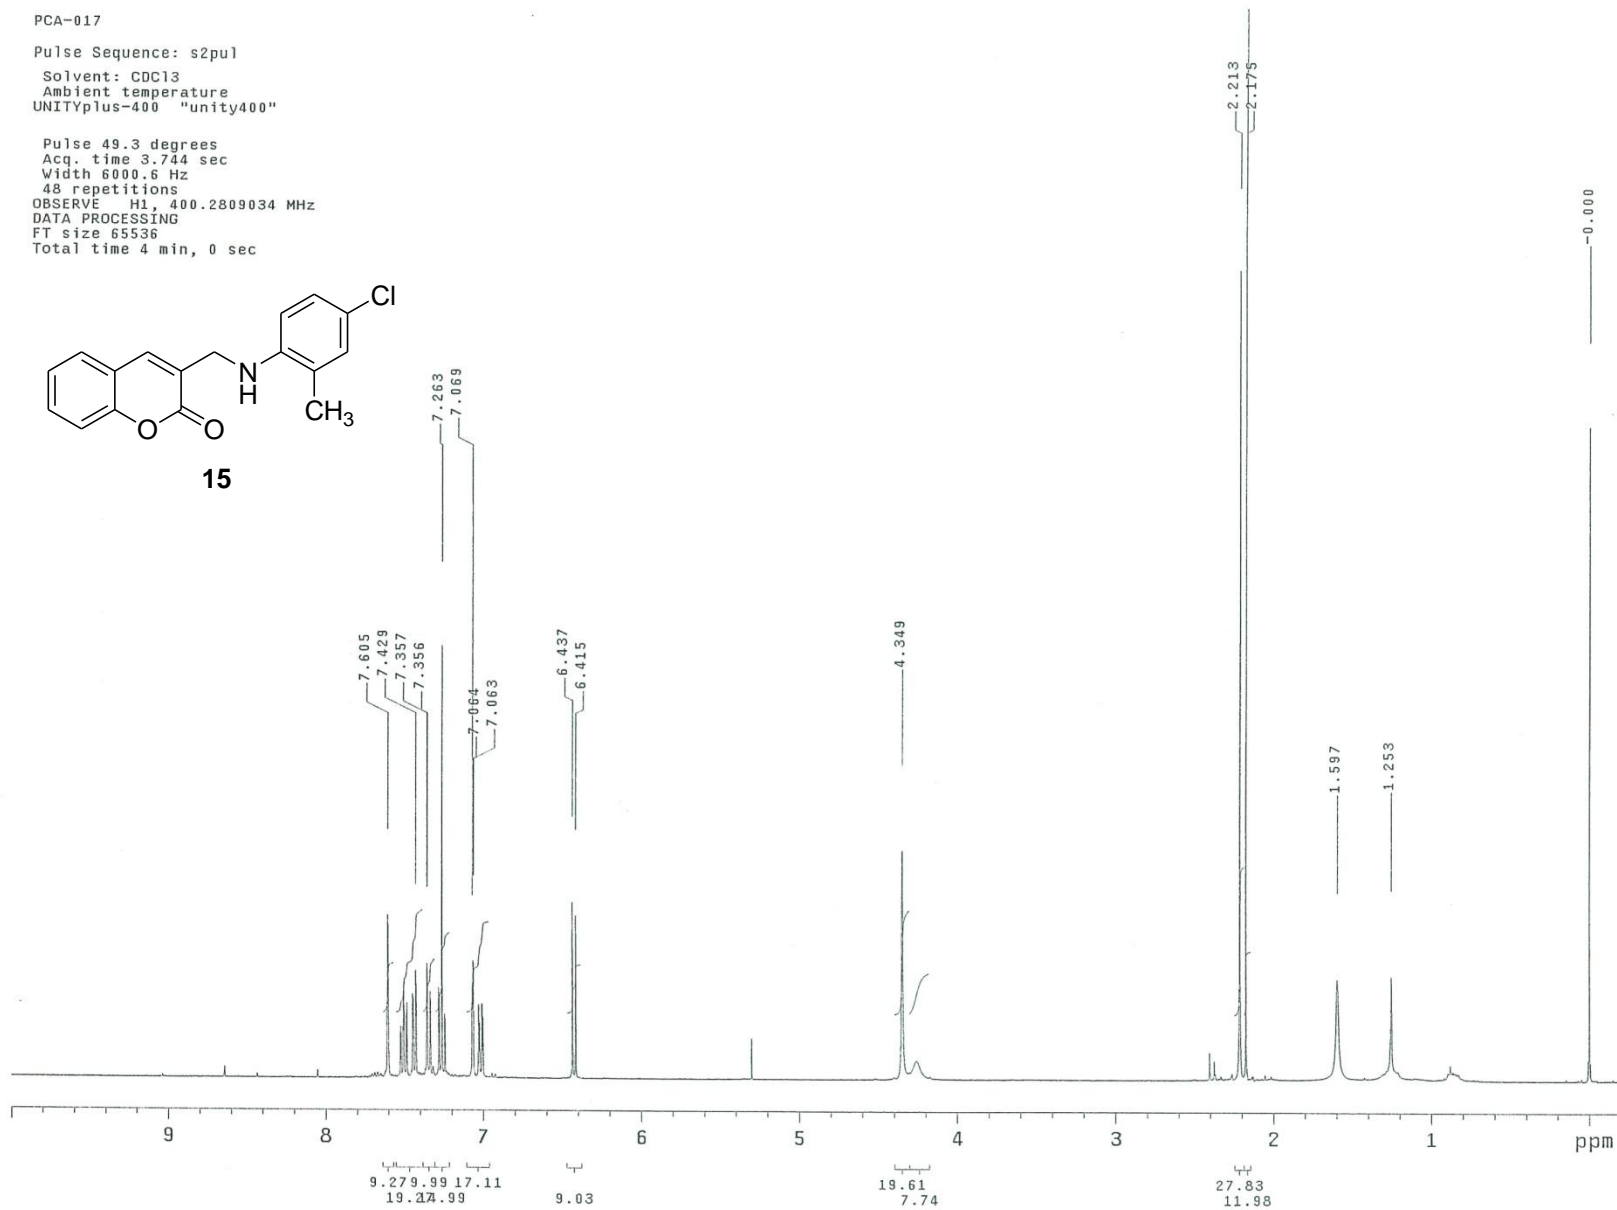

PCA-017

Pulse Sequence: s2pul

Solvent: CDCl<sub>3</sub>

Ambient temperature  
UNITYplus-400 "unity400"

Pulse 60.9 degrees  
Acq. time 1.200 sec  
Width 25000.0 Hz  
3200 repetitions  
OBSERVE C13, 100.6507142 MHz  
DECOUPLE H1, 400.2829124 MHz  
Power 45 dB  
continuously on  
WALTZ-16 modulated  
DATA PROCESSING  
Line broadening 1.0 Hz  
FT size 65536  
Total time 10 hr, 45 min, 47 sec

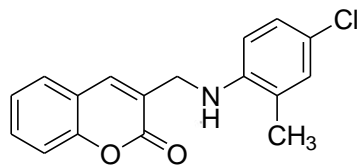

15

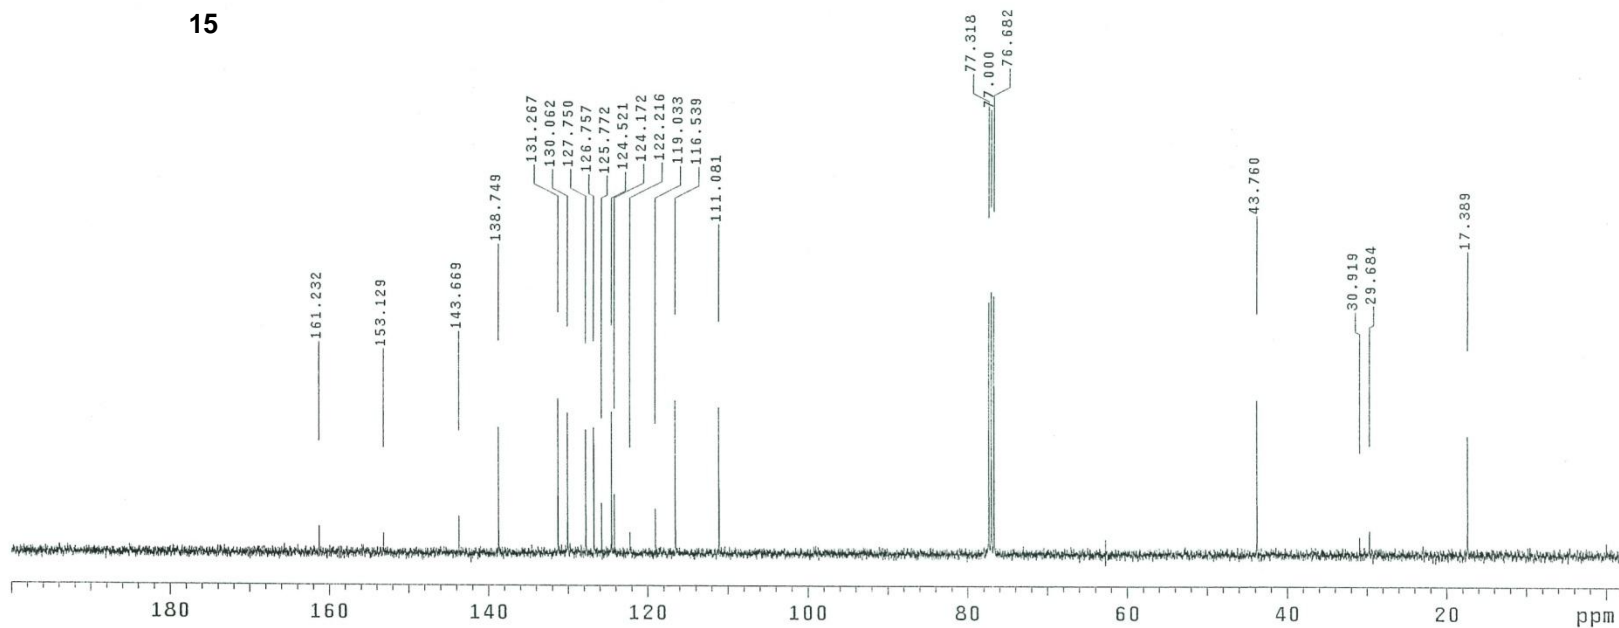

Supplement: c2ob26860d.pdf [file c2ob26860d.pdf]
